# Supplementary material
Source: ML conference proceedings conference paper supplement (https://openaccess.thecvf.com/content/WACV2023/html/Gomez_Improving_the_Pair_WACV_2023_paper.html)
Supplement: Supplementary file 1 [file Gomez_Improving_the_Pair_WACV_2023_supplemental.pdf]

# **Improving the Pair Selection and the Model Fusion Steps of Satellite Multi-View Stereo Pipelines**

## **(Supplementary material)**

Alvaro Gómez, Gregory Randall  
Facultad de Ingeniería  
Universidad de la República, Uruguay  
agomez@fing.edu.uy

Gabriele Facciolo, Rafael Grompone von Gioi  
Centre Borelli  
ENS Paris-Saclay, France

### **1. Supplementary material**

Figure 1 and Figure 2 present more examples of the plots in Figure 5 of the paper.

Figures 3, 4 and 5 present more examples of the images in Figure 7 of the paper.

Please refer to the corresponding captions in the paper.

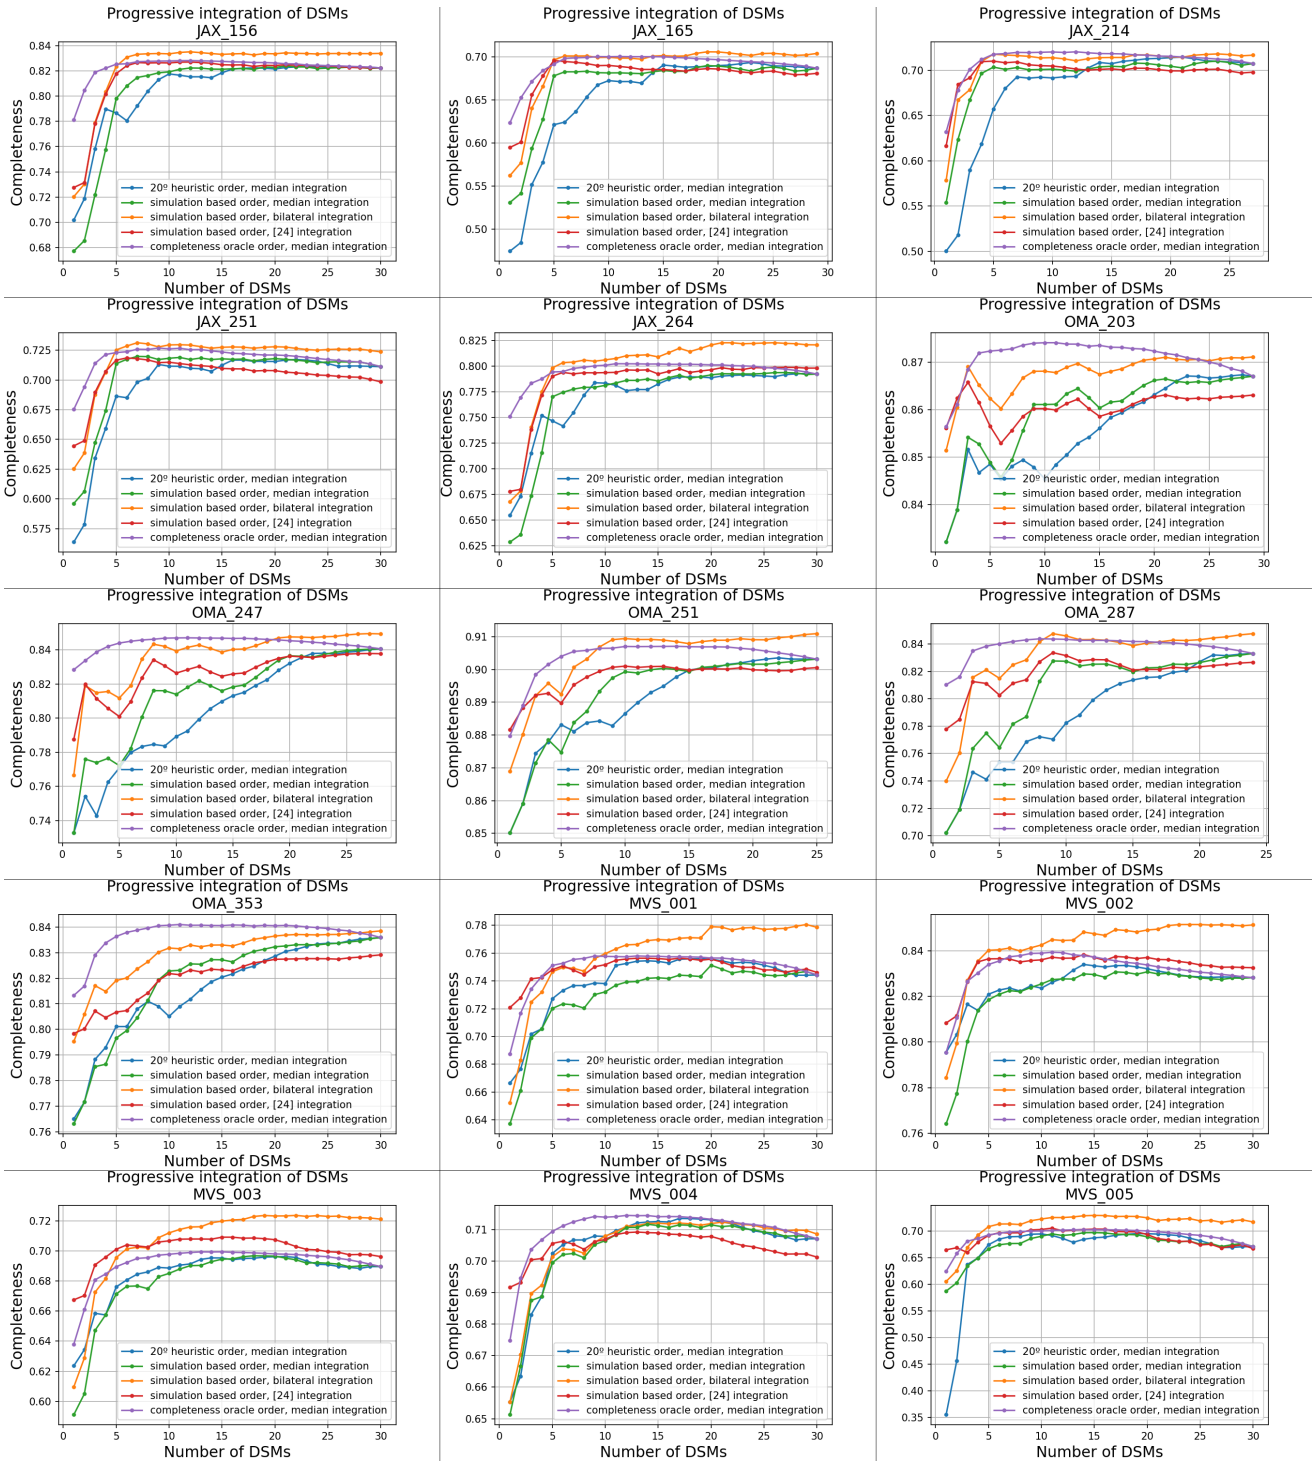

Figure 1. Progressive integration of DSMs for several regions. Completeness metric.

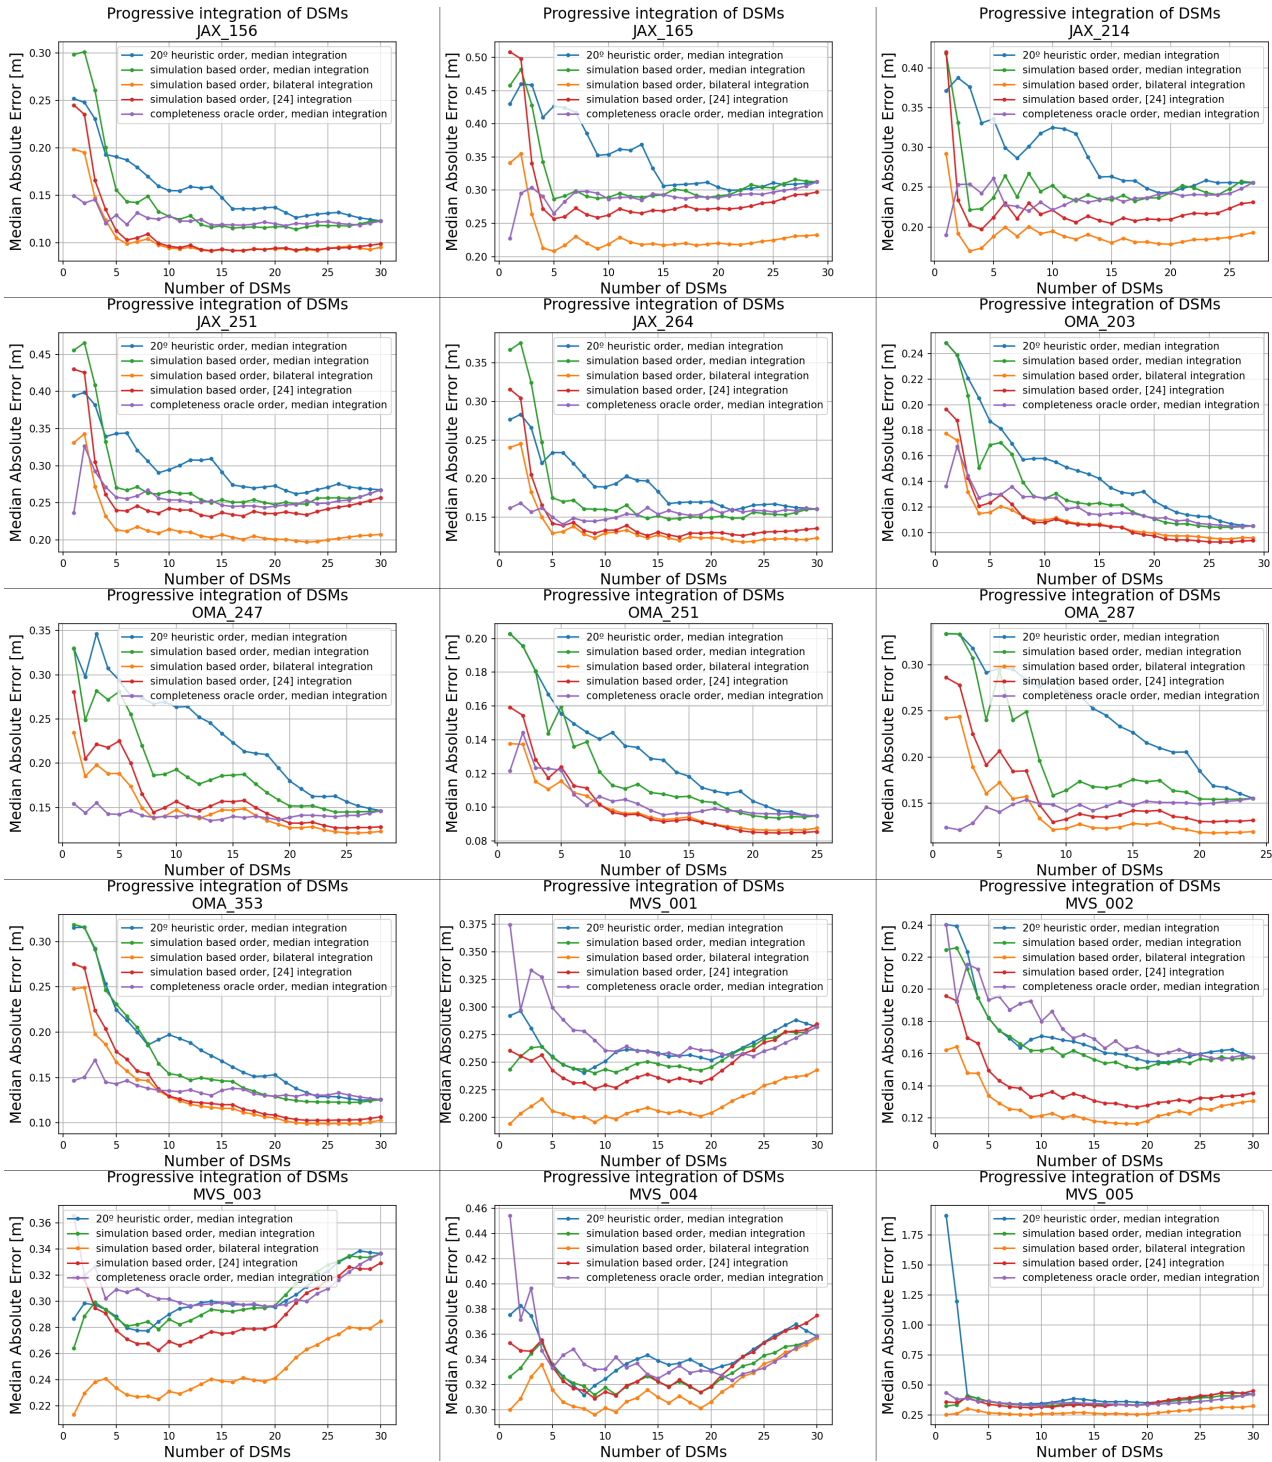

Figure 2. Progressive integration of DSMs for several regions. Median absolute error metric.



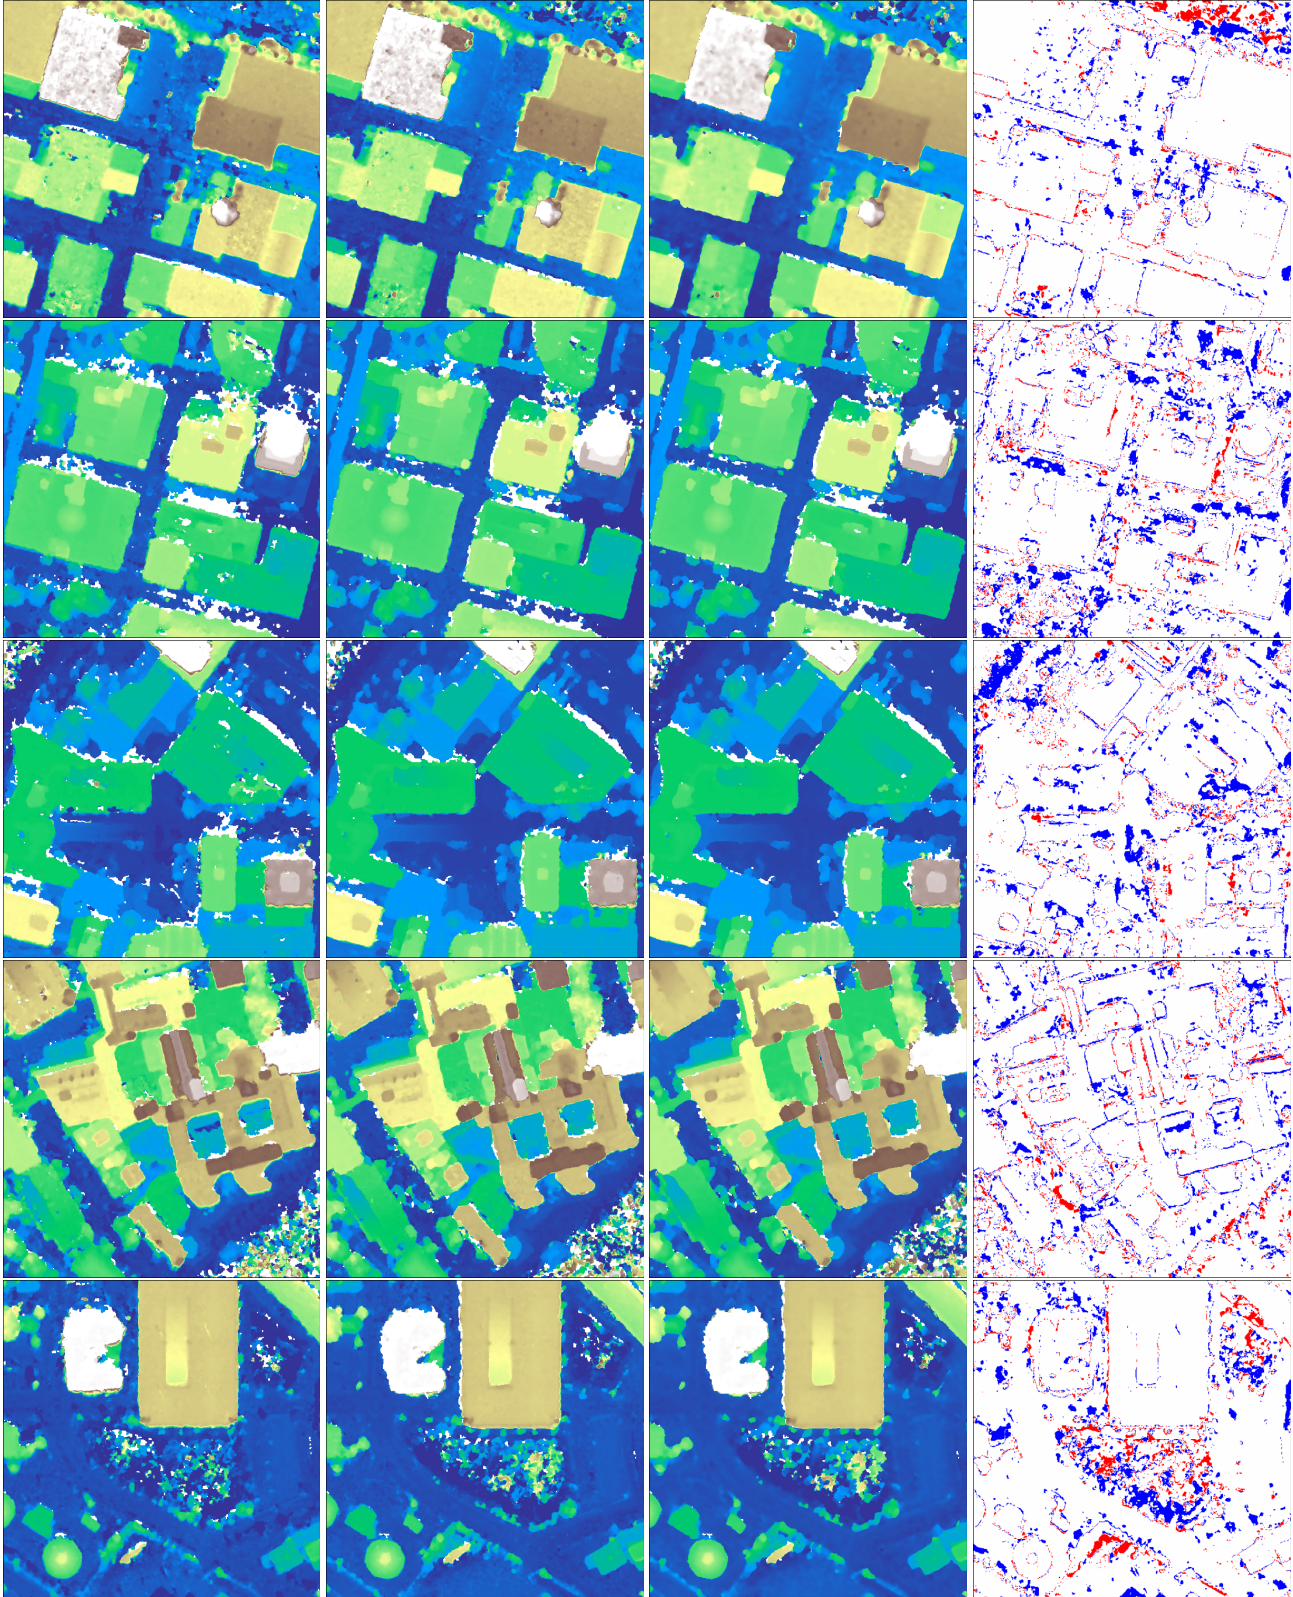

Figure 3. Results for regions from Jacksonville



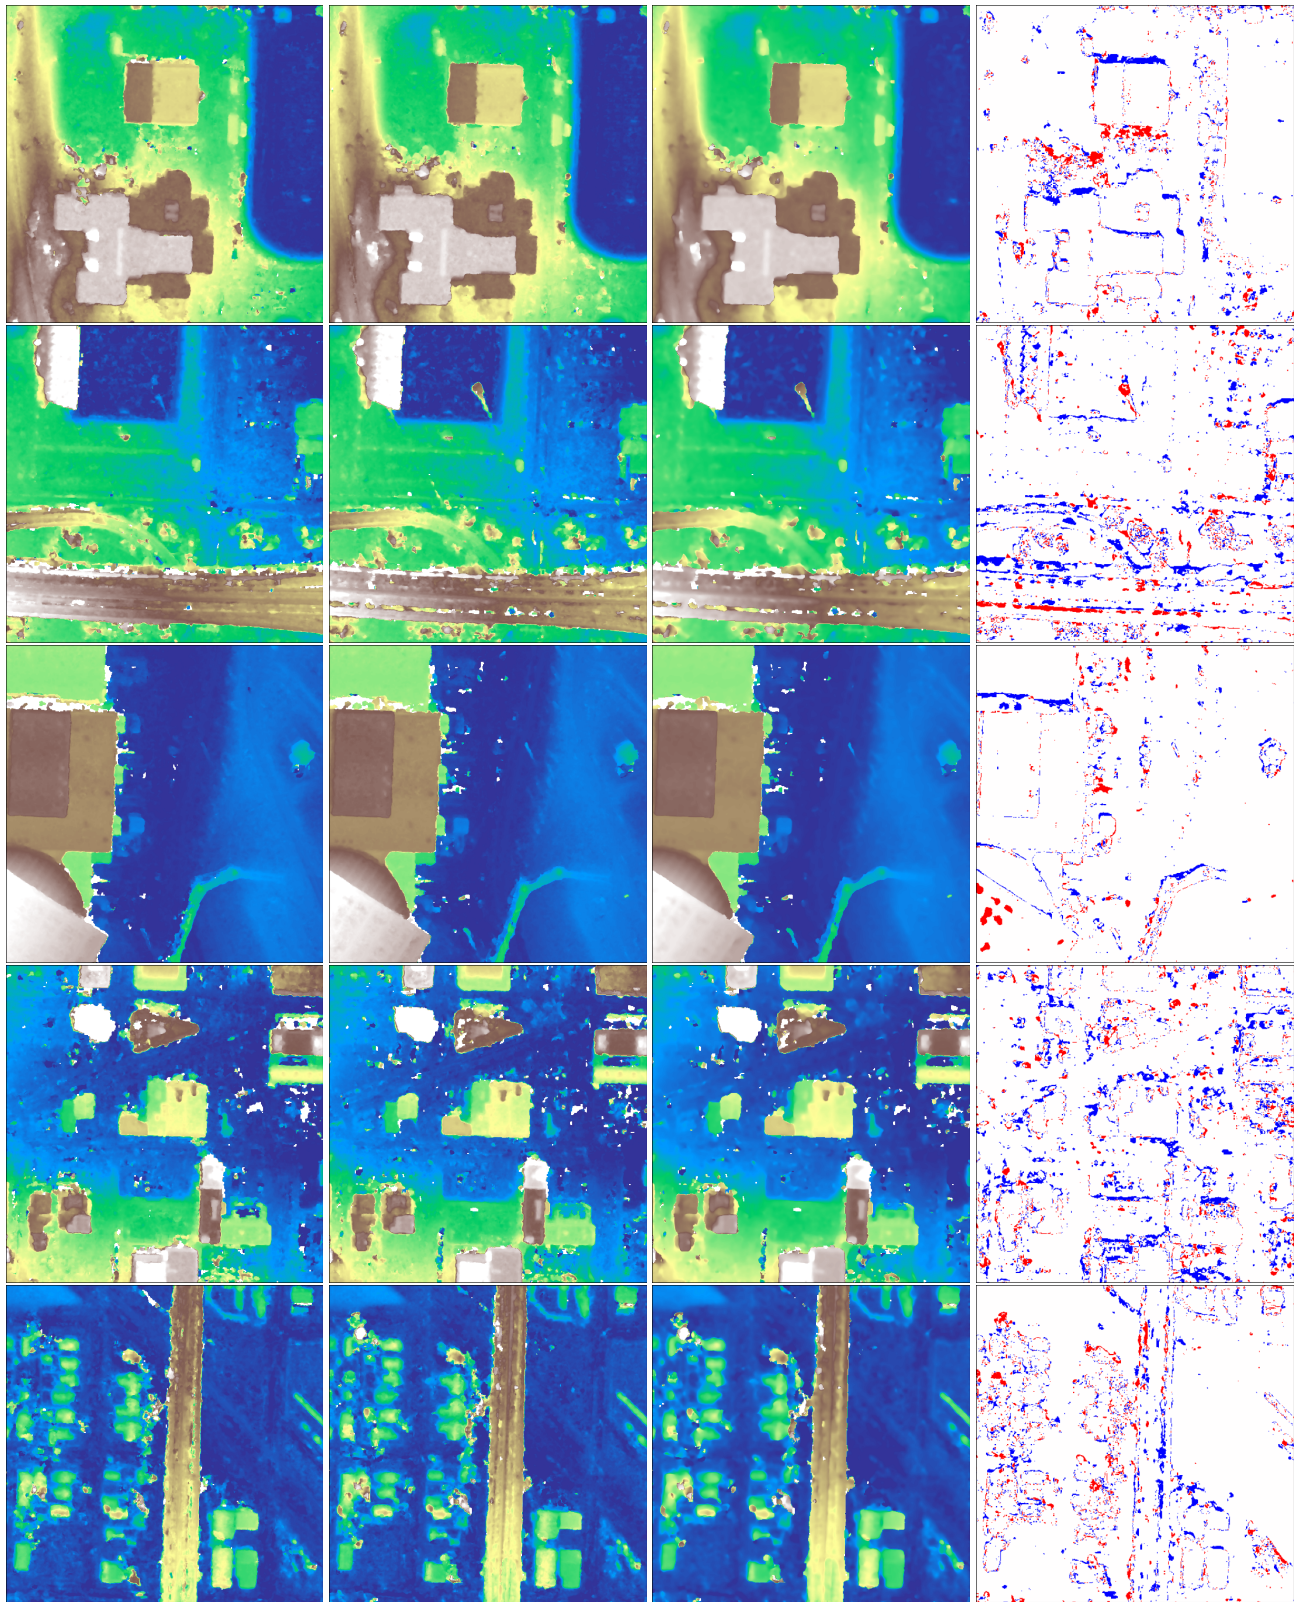

Figure 4. Results for regions from Omaha



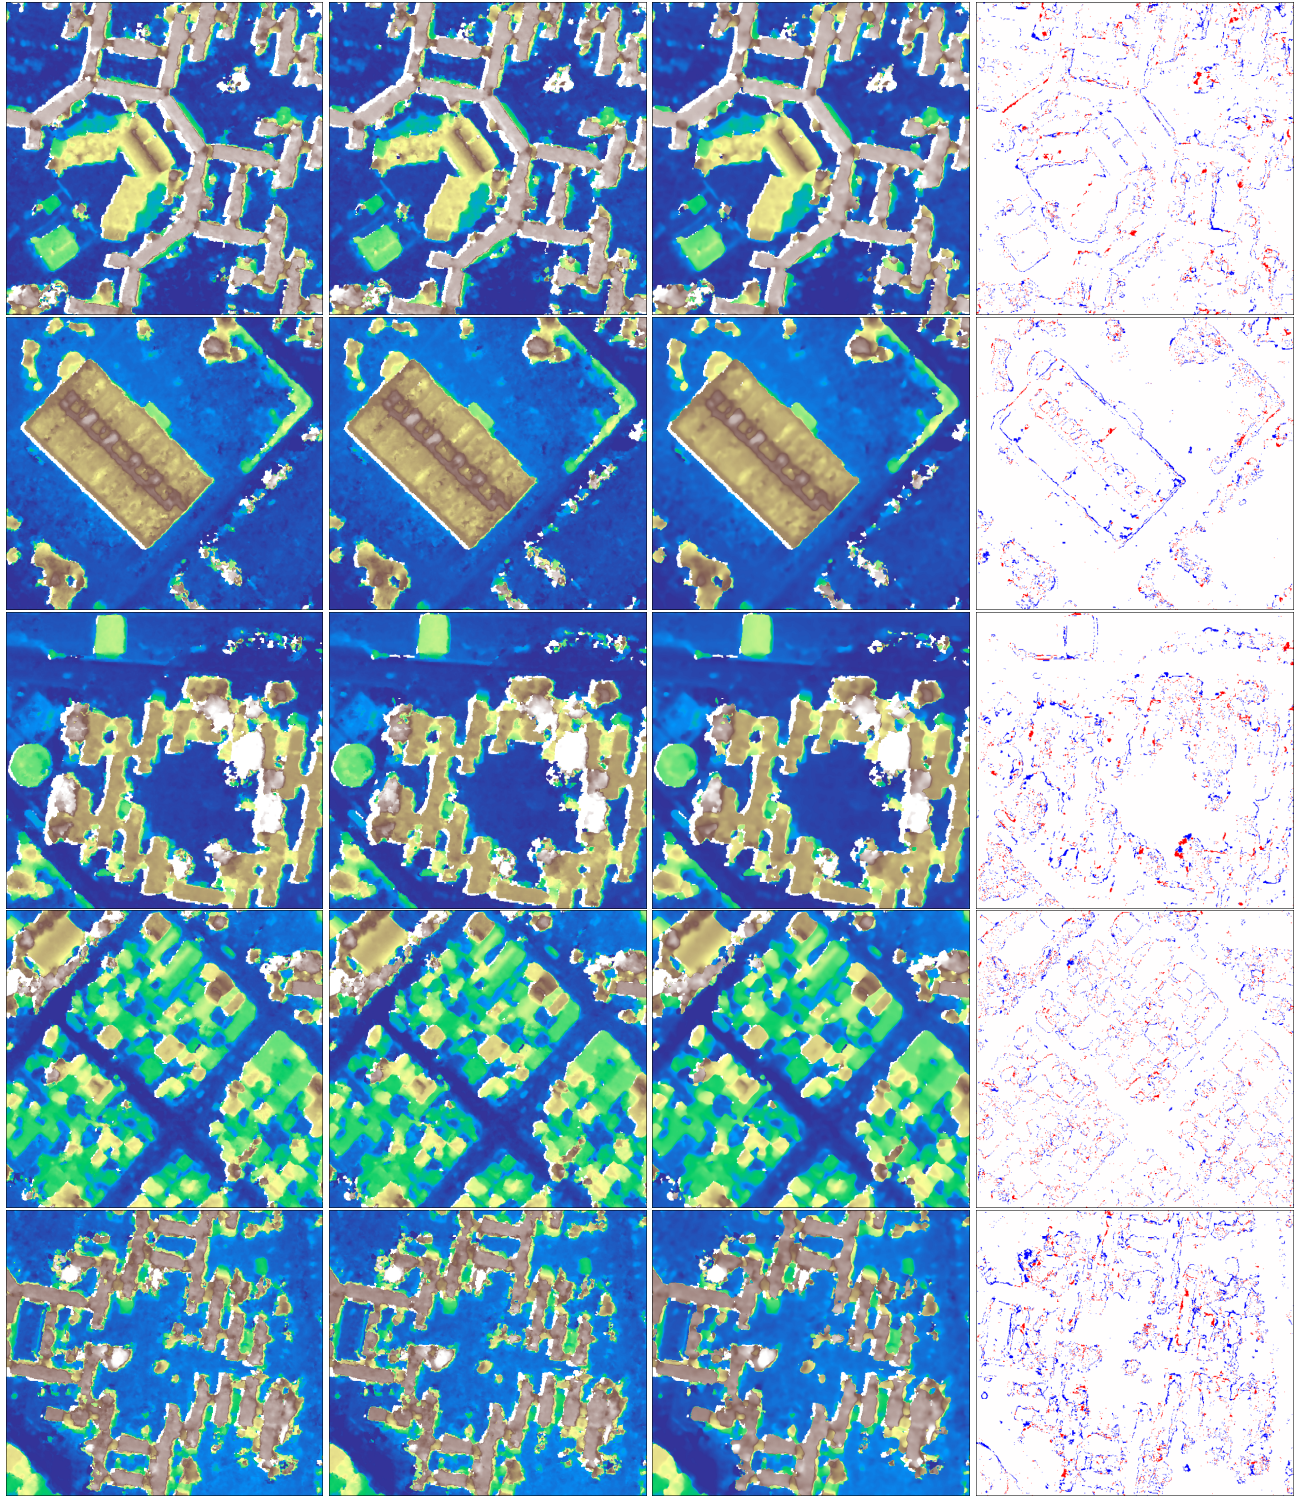

Figure 5. Results for regions from Buenos Aires
